# Supplementary material
Source: publisher site journal article supplement (http://e-cmh.org/upload/media/cmh-2021-0355-suppl6.pdf)
Supplement: Supplementary file 1 [file cmh-2021-0355-suppl6.pdf]

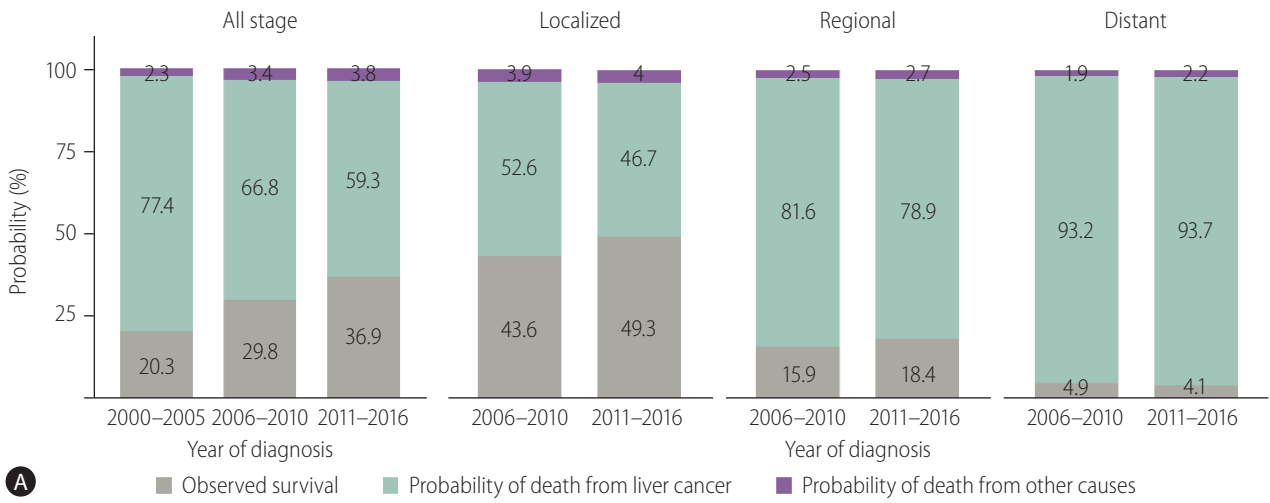

**A** ■ Observed survival ■ Probability of death from liver cancer ■ Probability of death from other causes

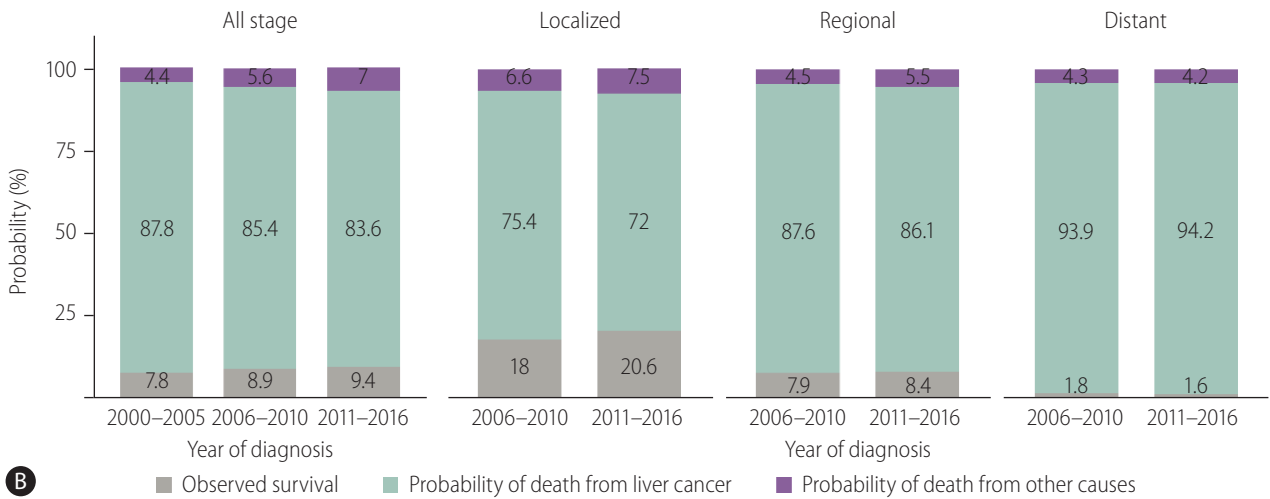

**B** ■ Observed survival ■ Probability of death from liver cancer ■ Probability of death from other causes

**Supplementary Figure 6.** Five-year survival and cause-specific competing risks probability of death of patients with hepatocellular carcinoma and intrahepatic cholangiocarcinoma, 2000–2016. (A) Hepatocellular carcinoma. (B) Intrahepatic cholangiocarcinoma. Tumor stage information was available from 2006. The probability of death was estimated by the cumulative incidence function. Percentages are rounded to one decimal place.
